# Supplementary material for: Factors Associated with Hepatitis B Surface Antigen Kinetics and Responses in Pegylated Interferon Alpha-2a Monotherapy for Patients with Chronic Hepatitis B
Source: PubMed Central journal article supplement — Intern Med. 2021 Feb 15;60(4):507–16. doi: 10.2169/internalmedicine.5432-20 (PMC7946504; doi:10.2169/internalmedicine.5432-20), 2021-02-15
Supplement: 1349-7235-60-0507-s001.pdf [file 1349-7235-60-0507-s001.pdf]

**Supplemental Table 1.** Comparison of baseline characteristics in patients with chronic hepatitis B who were treated with Peg-IFN $\alpha$ -2a monotherapy according to HBV genotype.

| Factors                                                                   | genotype A (n=7)   | genotype B (n=12)  | genotype C (n=30)    | P value<br>(B vs non-B)        |
|---------------------------------------------------------------------------|--------------------|--------------------|----------------------|--------------------------------|
| Age (years) <sup>a</sup>                                                  | 43 (35-56)         | 60 (43-70)         | 39 (22-61)           | 2.81 $\times$ 10 <sup>-5</sup> |
| Gender (Male / Female)                                                    | 6 / 1              | 4 / 8              | 17 / 13              | 0.104                          |
| HBeAg-positive / HBeAg-negative                                           | 3 / 4              | 0 / 12             | 12 / 18              | 9.52 $\times$ 10 <sup>-3</sup> |
| HBV DNA (log IU/mL) <sup>a</sup>                                          | 5.40 (3.70- >9.10) | 5.00 (2.10-7.8)    | 5.80 (3.30- >9.10)   | 0.156                          |
| HBsAg (log IU/mL) <sup>a</sup>                                            | 3.92 (3.54-5.10)   | 2.28 (1.54-3.28)   | 3.63 (1.08-4.75)     | 1.61 $\times$ 10 <sup>-5</sup> |
| HBcrAg (log IU/mL) <sup>a</sup>                                           | 3.00 (2.90-6.80)   | 2.90 (< 2.90-4.50) | 3.70 (< 2.90-7.00 <) | 0.055                          |
| Platelet count ( $\times$ 10 <sup>3</sup> /mm <sup>3</sup> ) <sup>a</sup> | 19.9 (16.4-27.0)   | 20.5 (15.6-38.0)   | 18.6 (10.5-34.8)     | 0.243                          |
| Alanine aminotransferase (IU/L) <sup>a</sup>                              | 37 (14-109)        | 24 (13-136)        | 50 (12-312)          | 0.063                          |
| $\alpha$ -fetoprotein (ng/mL) <sup>a</sup>                                | 2.8 (2.5-5.1)      | 2.7 (1.-5.9)       | 4.4 (1.1-106.2)      | 0.113                          |

Categorical variables are given as number. Continuous variables are given as median (range)<sup>a</sup>.

Abbreviations: Peg-IFN $\alpha$ -2a, pegylated interferon  $\alpha$ -2a; HBeAg, hepatitis B envelope antigen; HBsAg, hepatitis B surface antigen; HBcrAg, hepatitis B virus core-related antigen
