# Supplementary material for: Factors Associated with Hepatitis B Surface Antigen Kinetics and Responses in Pegylated Interferon Alpha-2a Monotherapy for Patients with Chronic Hepatitis B
Source: PubMed Central journal article supplement — Intern Med. 2021 Feb 15;60(4):507–16. doi: 10.2169/internalmedicine.5432-20 (PMC7946504; doi:10.2169/internalmedicine.5432-20), 2021-02-15

(a)

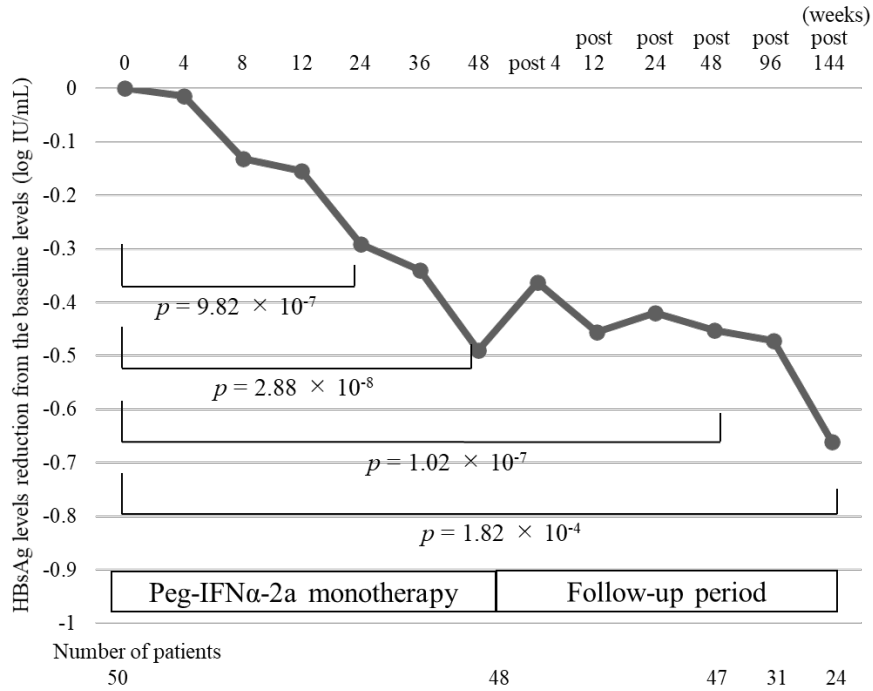

(b)

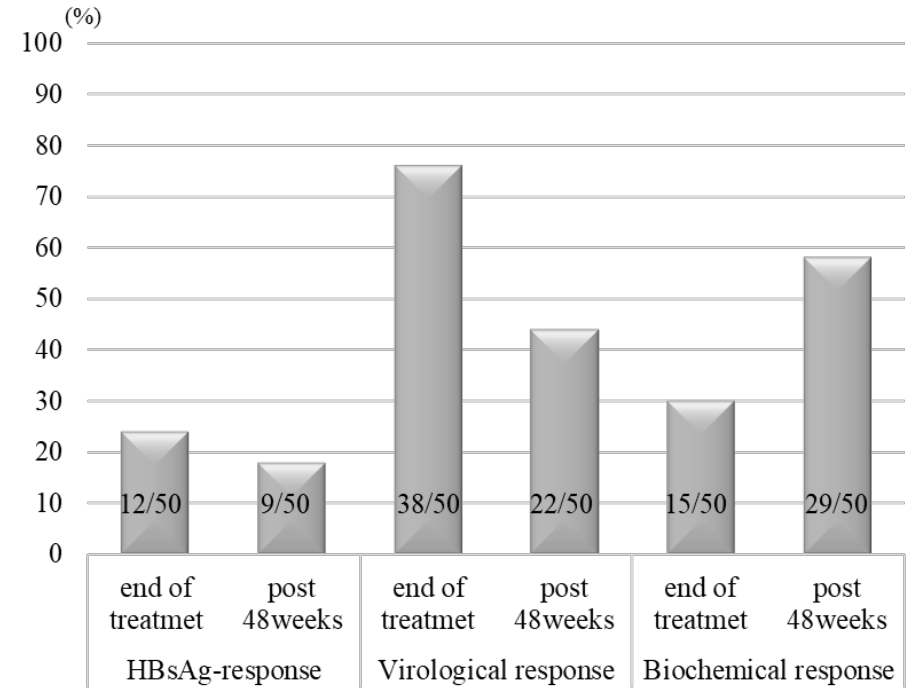

Supplement: 1349-7235-60-0507-s002.pdf [file 1349-7235-60-0507-s002.pdf]
